# Supplementary material
Source: publisher figshare collection journal article supplement (https://acs.figshare.com/ndownloader/files/6994496)
Supplement: Supplementary file 1 [file 6994496]

**Electronic Supplementary Material**

**For**

**Threshold Collision-Induced Dissociation of Proton-Bound Hydrazine and**

**Dimethylhydrazine Clusters**

Christopher P. McNary and P. B. Armentrout\*

*Department of Chemistry, University of Utah, 315 S. 1400 E. Room 2020 Salt Lake City, UT*  
*84112, USA.*

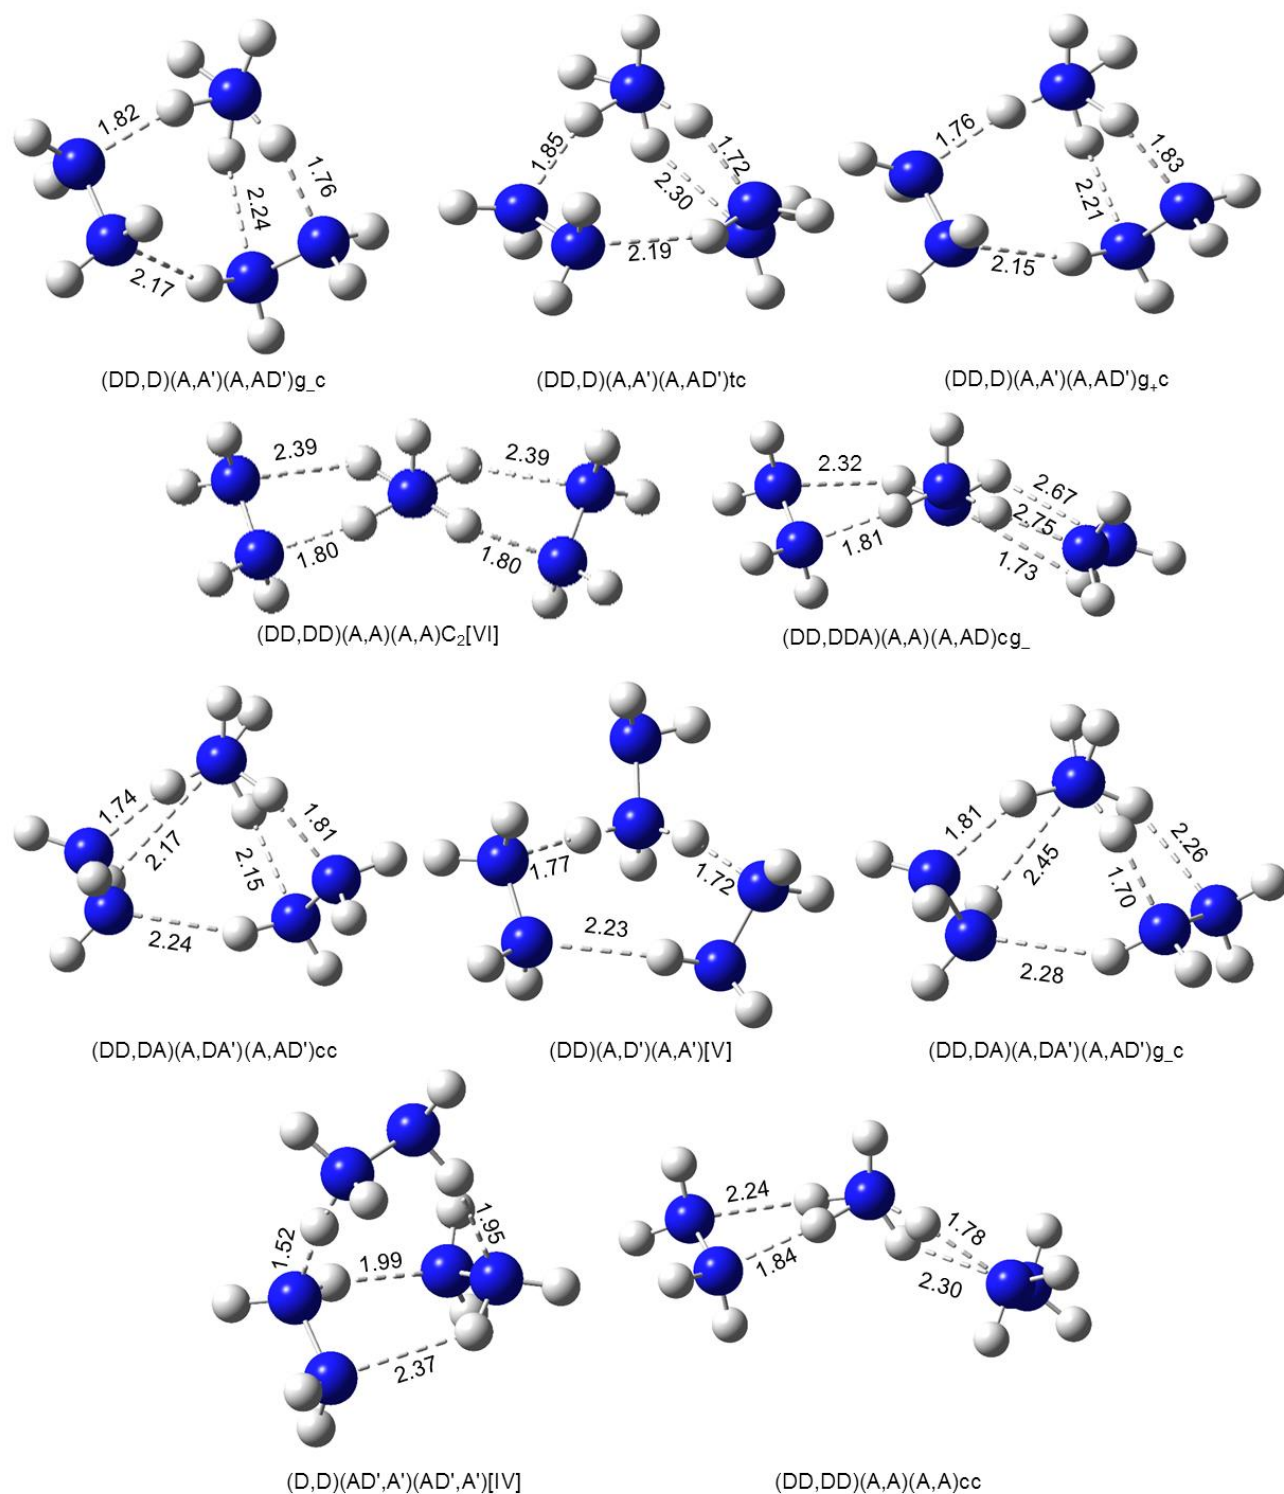

**Figure S1.** The ten low-lying isomers of  $(\text{N}_2\text{H}_4)_3\text{H}^+$  calculated at the B3LYP-GD3BJ/6-311+G(d,p) level of theory. Hydrogen bonds are indicated by dashed lines with distances indicated in Å. In all cases, the protonated hydrazine is located at the top.

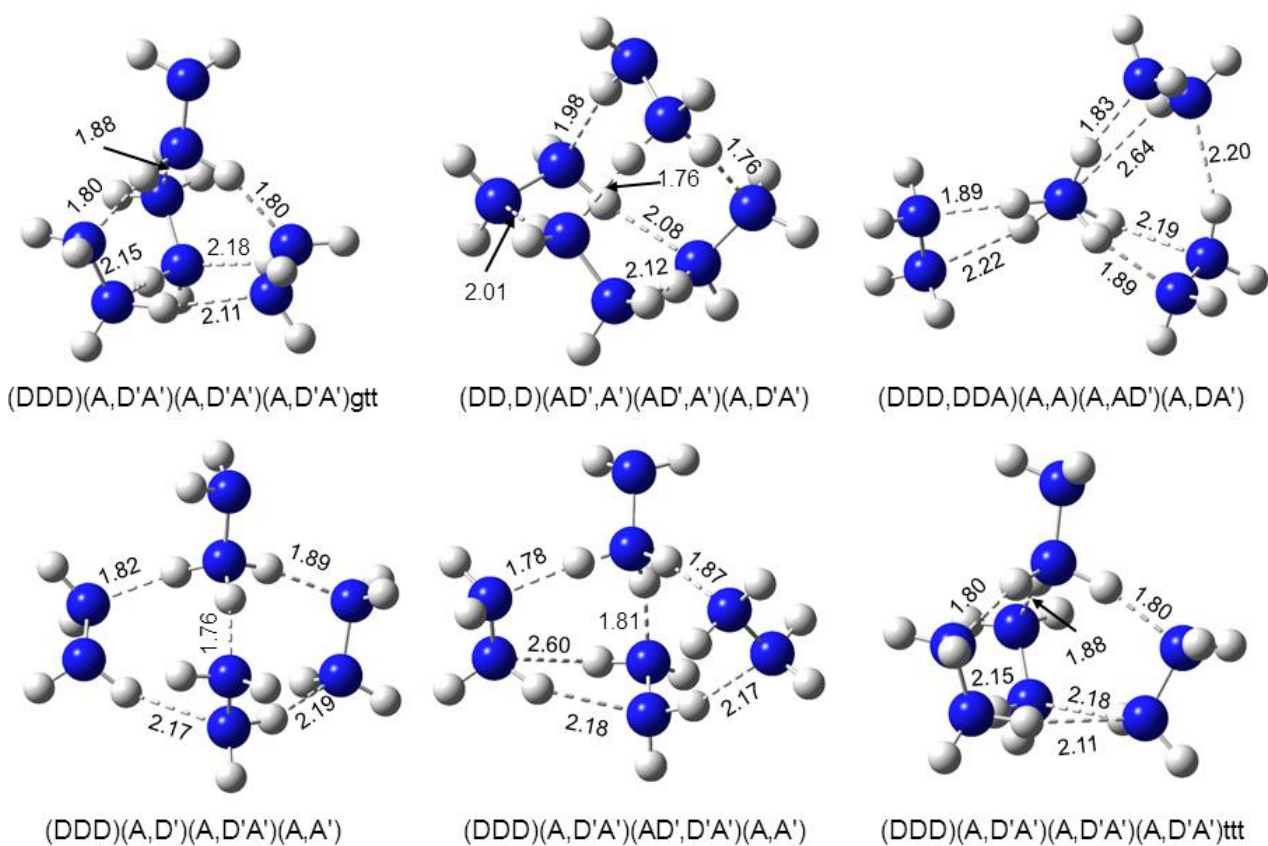

**Figure S2.** The six low-lying isomers of  $(\text{N}_2\text{H}_4)_4\text{H}^+$  calculated at the B3LYP-GD3BJ/6-311+G(d,p) level of theory. Hydrogen bonds are indicated by dashed lines with distances indicated in Å. In all cases, the protonated hydrazine is located at the top.

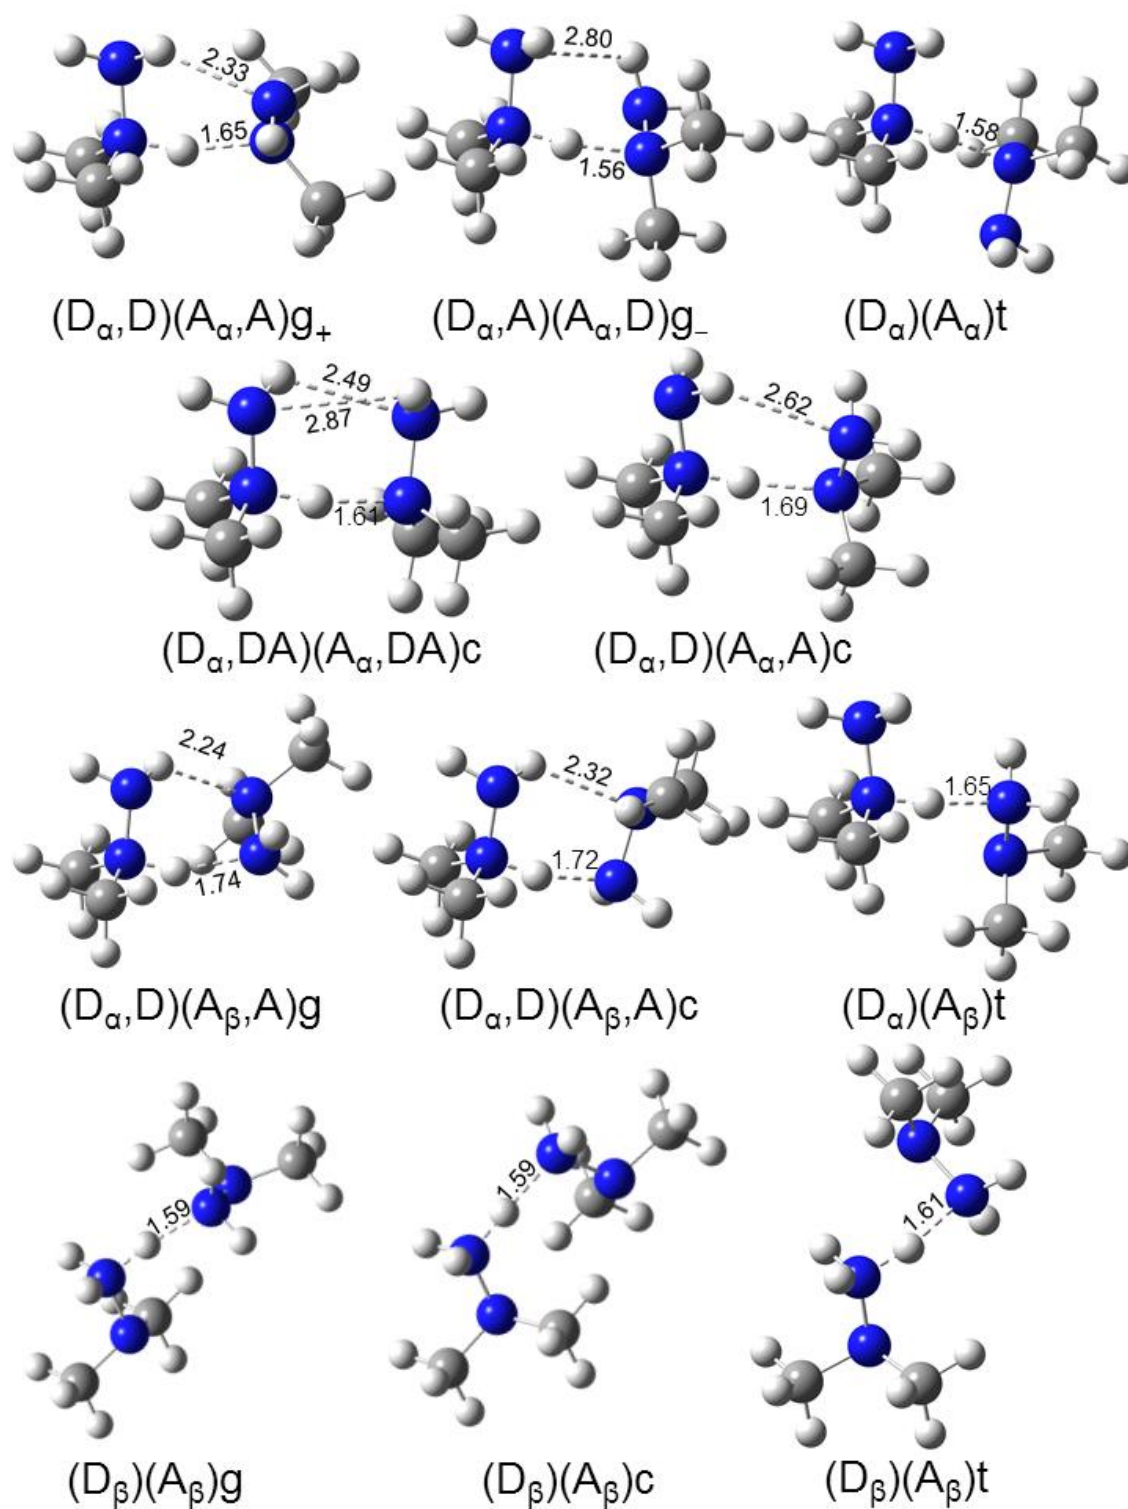

**Figure S3.** The 11 isomers of  $[(CH_3)_2N_2H_2]_2H^+$  calculated at the B3LYP-GD3BJ/6-311+G(d,p) level of theory. Hydrogen bonds are indicated by dashed lines with distances indicated in Å. In all cases, the protonated UDMH is located to the left.
